# Supplementary material for: Fabrication of smart nanocontainers with a mesoporous core and a pH-responsive shell for controlled uptake and release
Source: Royal Society of Chemistry journal article supplement (doi:10.1039/b820534e), 2009-01-01
Supplement: b820534e.pdf [file b820534e.pdf]

Supplementary Material (ESI) for Journal of Materials Chemistry

**Table S1.** Characters of the MSN-OH, MSN-RAFT and MSN-PAA

| Material | BET Surface Area (m <sup>2</sup> /g) | BET Pore Volume (cm <sup>3</sup> /g) | BJH Pore Diameter (Å) | <i>d</i> <sub>100</sub> (Å) |
|----------|--------------------------------------|--------------------------------------|-----------------------|-----------------------------|
| MSN-OH   | 1130                                 | 0.48                                 | 21.3                  | 21                          |
| MSN-RAFT | 840                                  | 0.36                                 | 22.6                  | 23                          |
| MSN-PAA  | 350                                  | 0.10                                 | 22.1                  | 21                          |

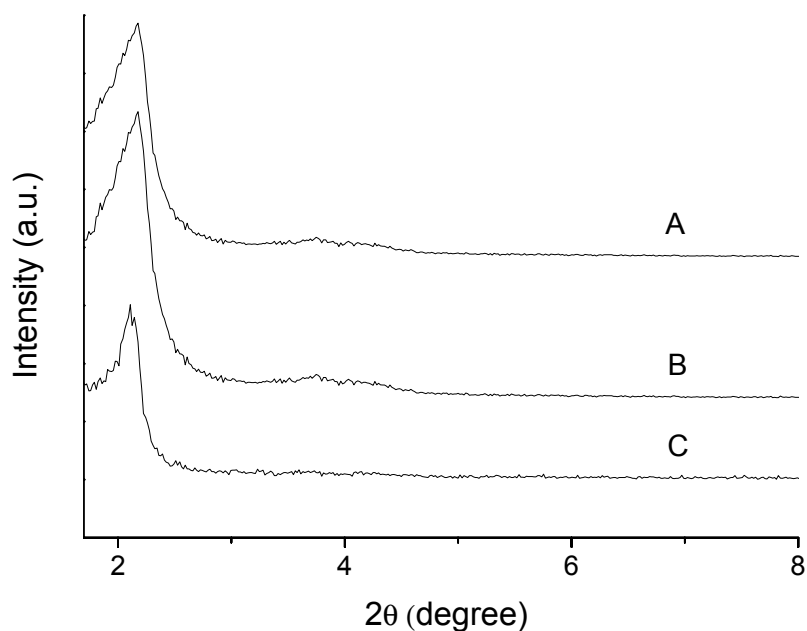

**Fig. S1** Powder X-Ray diffraction patterns of MSN-OH (A), MSN-RAFT (B), and MSN-PAA (C)

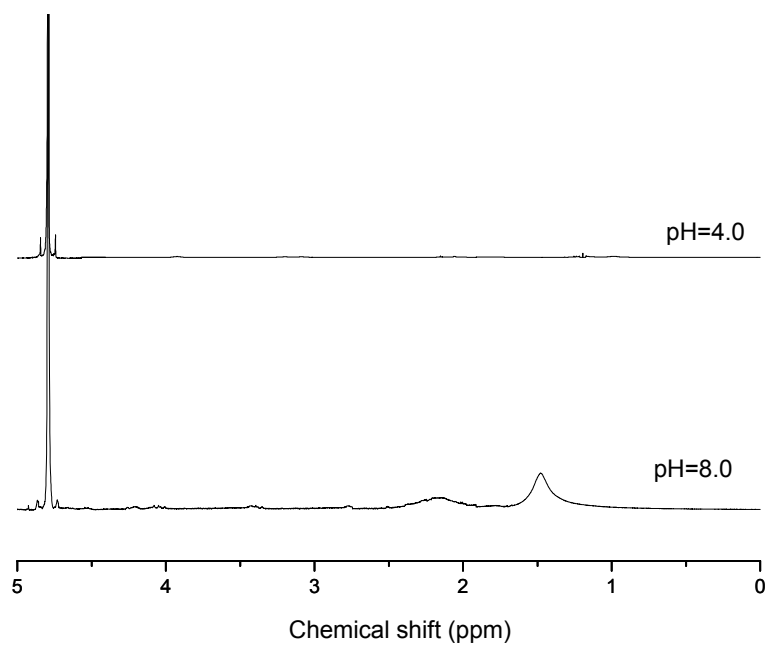

**Fig. S2**  $^1\text{H}$  NMR spectra of MSN-PAA with pH of 8.0 and 4.0 (in  $\text{D}_2\text{O}$ )

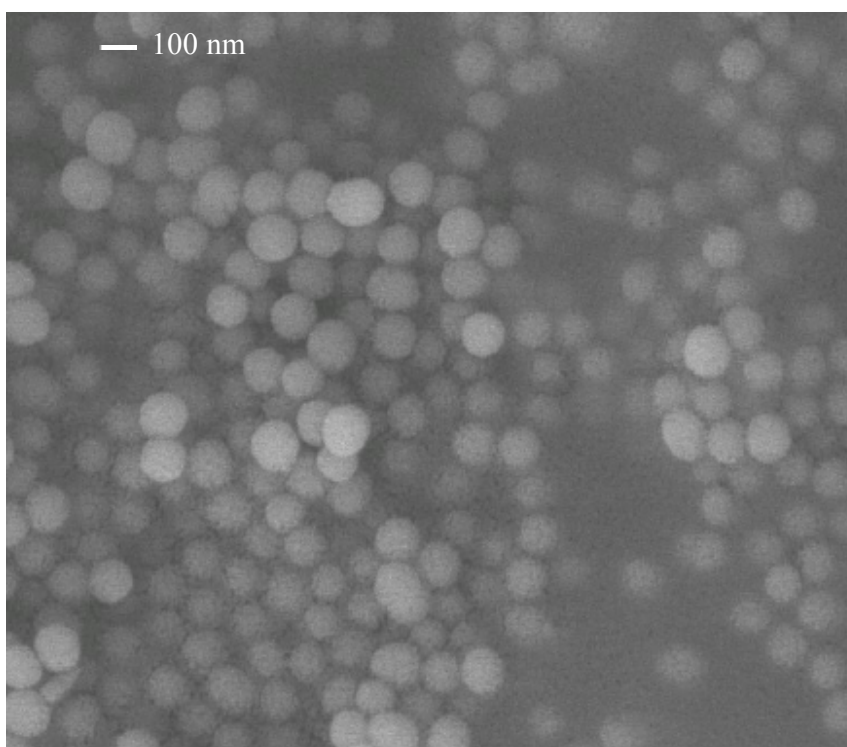

**Fig. S3** SEM image of MSN-PAA
